# Supplementary material
Source: PubMed Central journal article supplement (PMC5655115)
Supplement: AAC.01339-17_zac011176639s1.pdf [file AAC.01339-17_zac011176639s1.pdf]

**Supplemental Table S1** Primers and probes used in this study

| <b>Name</b>                                    | <b>Sequence</b>                        |
|------------------------------------------------|----------------------------------------|
| <b><i>penA</i> mosaic XXXIV PCR</b>            |                                        |
| <b><i>penA</i>-F</b>                           | 5'-GGTCAATACGCCTGCCTATGAG-3'           |
| <b><i>penA</i>-R</b>                           | 5'-ACCGGGTTCGATCATGTTCG-3'             |
| <b><i>penA</i>-FL</b>                          | 5'-GGCGCGGTTACGCCTCTGT-FAM-3'          |
| <b><i>penA</i>-Cy5</b>                         | 5'-Cy5-CGCTGTCTGCCTGACCGGGTTTG-Phos-3' |
| <b>Sanger sequencing of <i>penA</i> allele</b> |                                        |
| <b><i>penA</i>-FOR2</b>                        | 5'-GGGAGACGGTCCGATTTTAT-3'             |
| <b><i>penA</i>-REV3</b>                        | 5'-TTACCGATATTGACGGCAAAG-3'            |
